# Supplementary material
Source: publisher figshare collection journal article supplement (https://sage.figshare.com/ndownloader/files/14670773)

## Supplemental Figures

Supplemental Figure 1. a, Immediate post-revascularization imaging with perfusion noted in the right thumb despite no Doppler signal. b, 2 months post-revascularization with Doppler signal present in right thumb pulp.

Supplemental Figure 1a

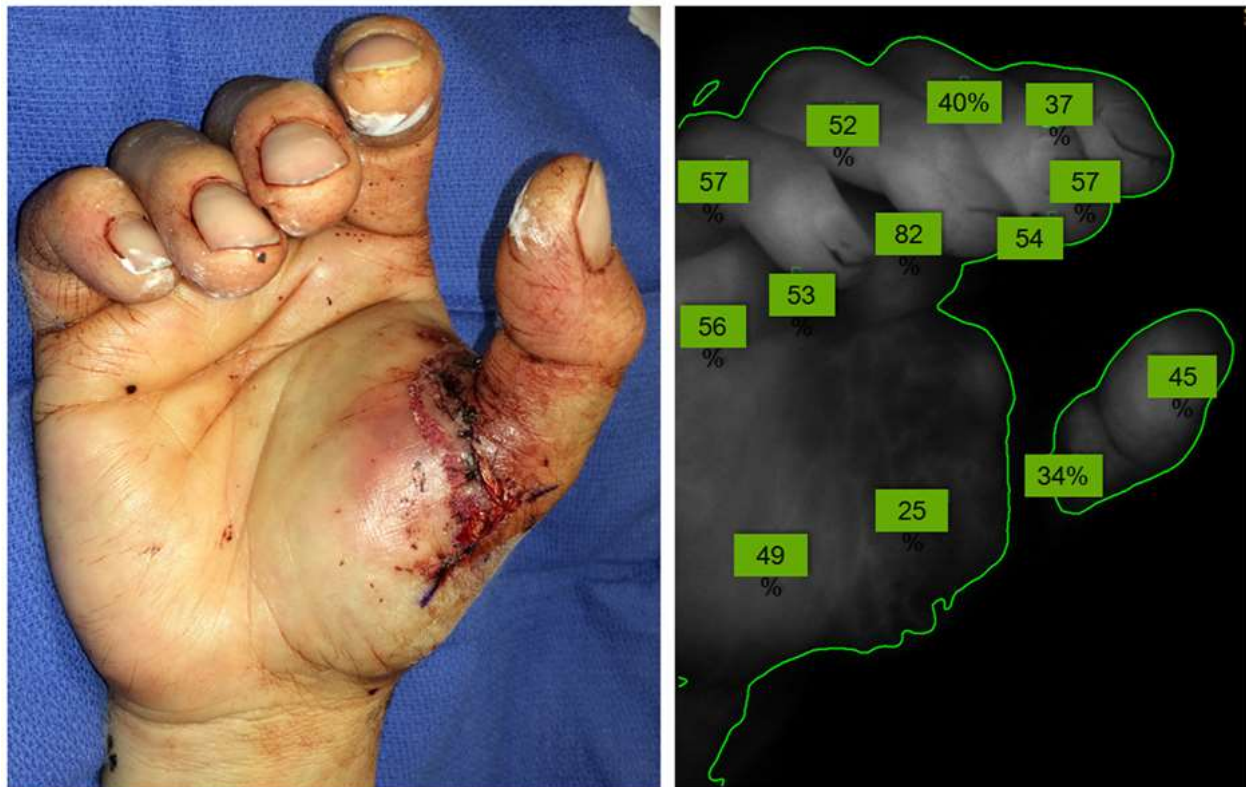

Supplemental Figure 1b

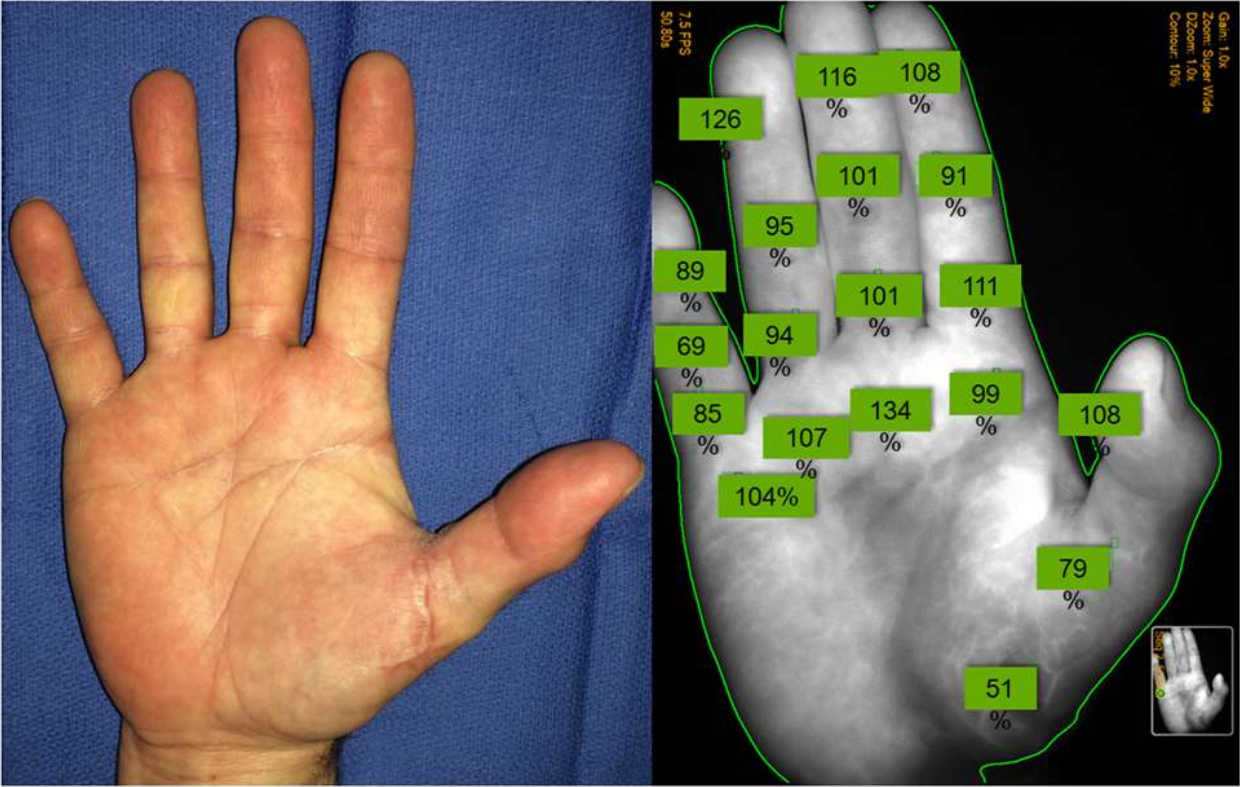

Supplement: Supplementary file 1 [file 14670773]
